# Supplementary material for: Glucose and H2O2 dual-sensitive nanogels for enhanced glucose-responsive insulin delivery
Source: Royal Society of Chemistry journal article supplement (doi:10.1039/c9nr01554j), 2019-01-01
Supplement: c9nr01554j1.pdf [file c9nr01554j1.pdf]

## Supplementary Information

### Glucose and H<sub>2</sub>O<sub>2</sub> dual-sensitive nanogels for enhanced glucose-responsive insulin delivery

Chang Li,<sup>a</sup> Xiaoyu Liu,<sup>a</sup> Yong Liu,<sup>a</sup> Fan Huang,<sup>\*c</sup> Gang Wu,<sup>a</sup> Ying Liu,<sup>a</sup> Zhanzhan Zhang,<sup>a</sup> Yuxun Ding,<sup>a</sup> Juan Lv,<sup>a</sup> Rujiang Ma,<sup>\*a</sup> Yingli An,<sup>a</sup> and Linqi Shi<sup>\*a,b</sup>

<sup>a</sup>*Key Laboratory of Functional Polymer Materials of Ministry of Education, Institute of Polymer Chemistry, State Key Laboratory of Medicinal Chemical Biology, College of Chemistry, Nankai University, Tianjin 300071, China.*

<sup>b</sup>*Collaborative Innovation Center of Chemical Science and Engineering (Tianjin), Nankai University, Tianjin 300071, China.*

<sup>c</sup>*Tianjin Key Laboratory of Radiation Medicine and Molecular Nuclear Medicine, Institute of Radiation Medicine, Chinese Academy of Medical Sciences & Peking Union Medical College, Tianjin, 300192, China.*

*Dedicated to 100<sup>th</sup> anniversary of Nankai University.*

Address correspondence to Linqi Shi (shilinqi@nankai.edu.cn), Rujiang Ma (marujiang@nankai.edu.cn), and Fan Huang (huangfanforever@126.com).

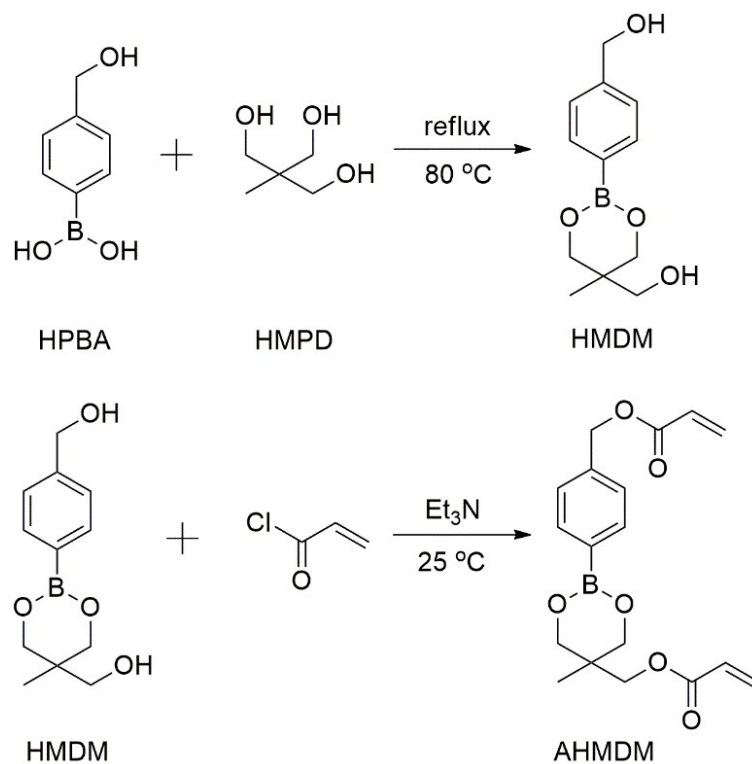

**Scheme S1.** Synthetic routes of HMDM and AHMDM.

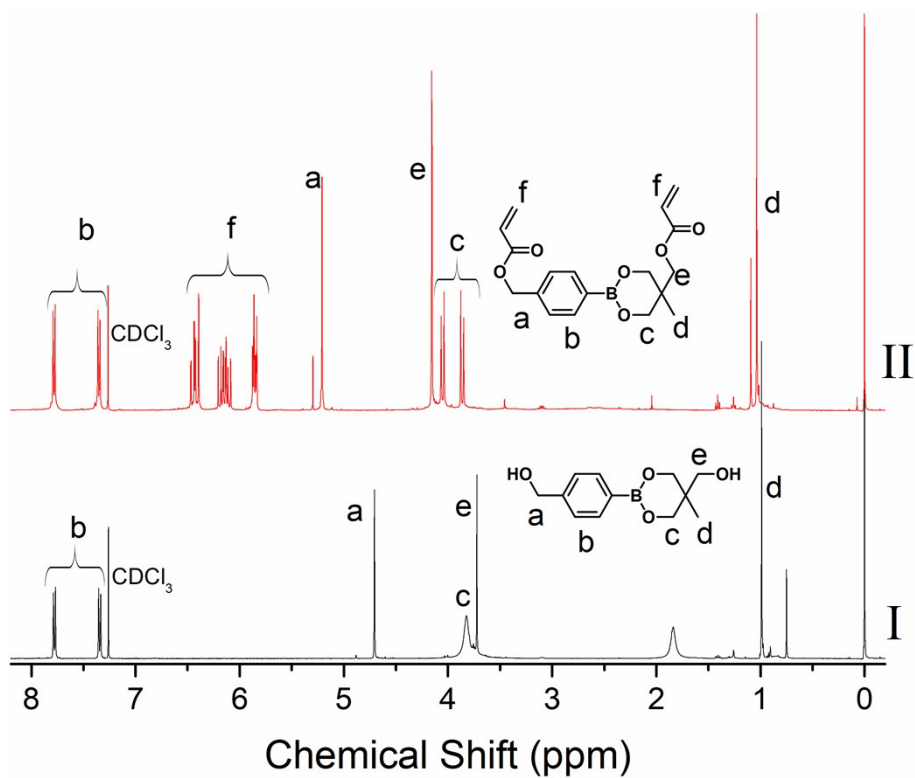

**Fig. S1.**  $^1\text{H}$  NMR spectra of HMDM (I) and AHMDM (II) in  $\text{CDCl}_3$ .

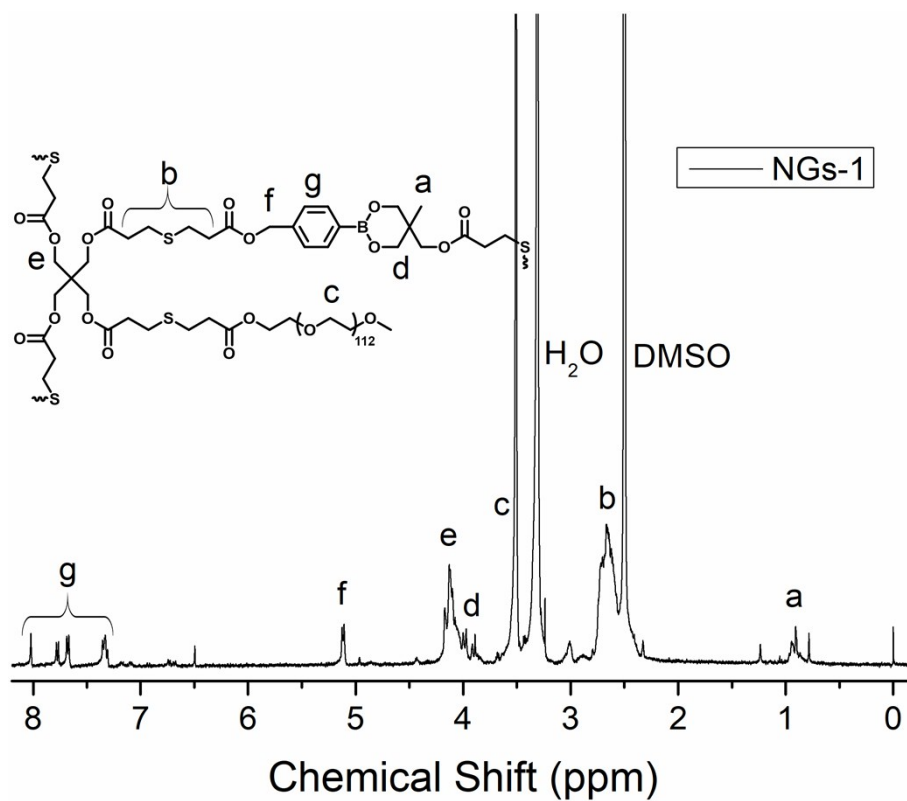

**Fig. S2.** <sup>1</sup>H NMR spectra of the nanogels (NGs-1) in DMSO-*d*<sub>6</sub>.

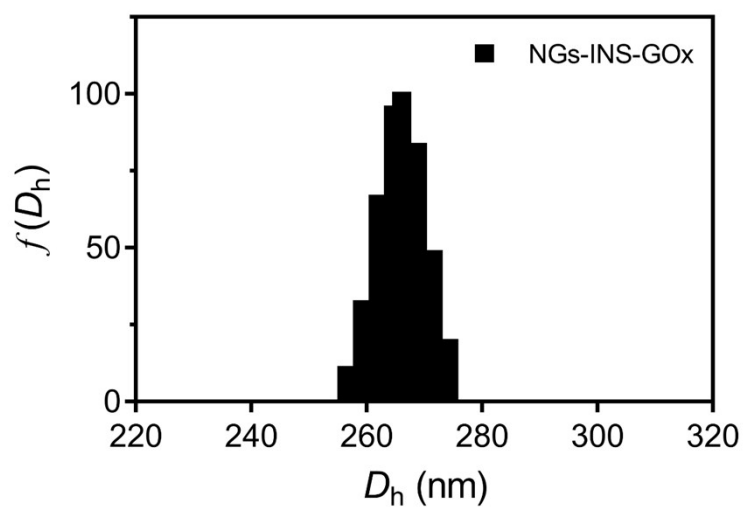

**Fig. S3.** DLS results of GOx and insulin loaded nanogels (NGs-GOx-INS).

**Table S1.** Zeta potentials of the nanogels and GOx-loaded nanogels.

| Code                | Zeta potentials (mv) |
|---------------------|----------------------|
| Nanogels            | -6.8±0.6             |
| GOx-loaded nanogels | -7.4±0.8             |

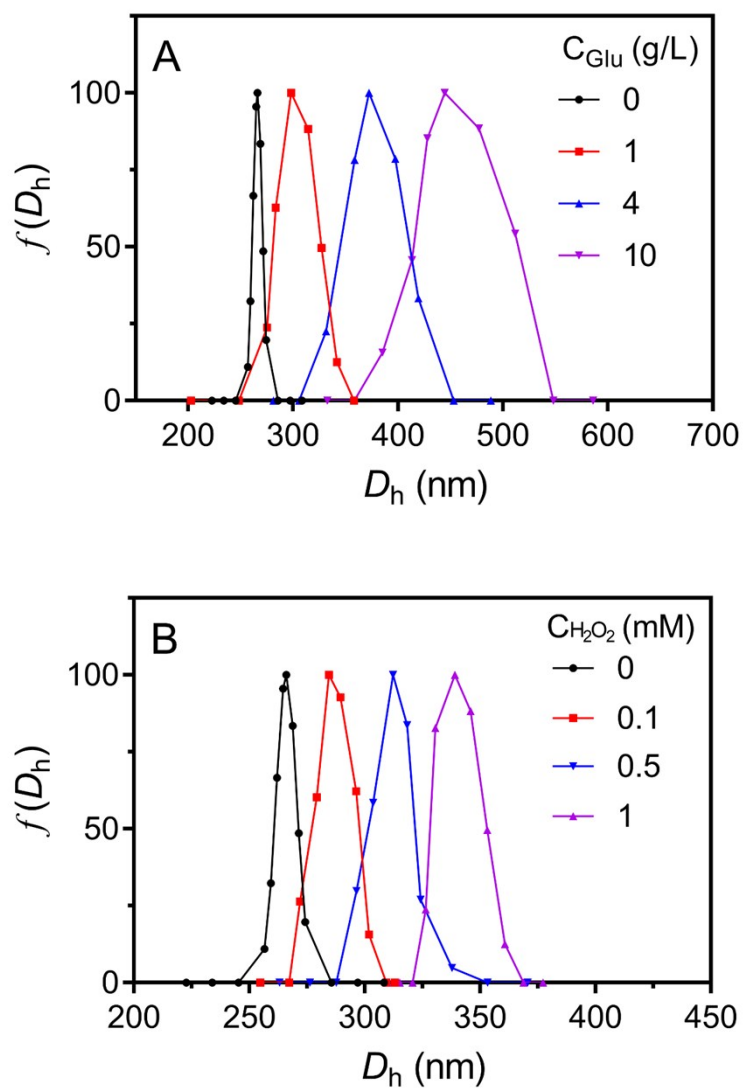

**Fig. S4.** Size distributions of nanogels in the presence of varying concentrations of (A) glucose or (B)  $H_2O_2$  for 1 h in PBS 7.4.

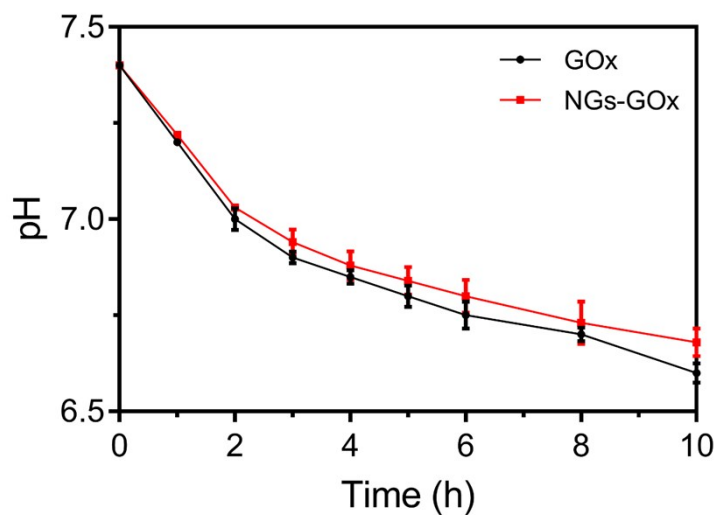

**Fig. S5.** The pH change of glucose solution ( $4 \text{ g L}^{-1}$ ) at  $25 \text{ }^\circ\text{C}$ , in the presence of free GOx or GOx-loaded nanogels (NGs-GOx).

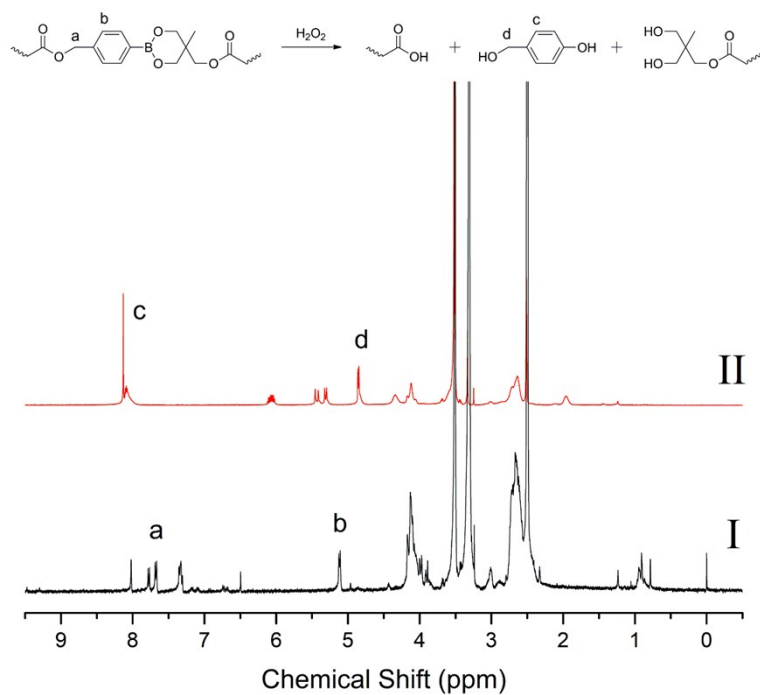

**Fig. S6.** The mechanism of the nanogels react with  $\text{H}_2\text{O}_2$ , and the  $^1\text{H}$  NMR spectra of nanogels before (I) and after (II) the treatment of  $\text{H}_2\text{O}_2$  (1 mM) for 4 h.  $\text{DMSO-}d_6$  was used as solvents.
